# Supplementary material for: Surfactant-free hydrothermal synthesis of Cu2ZnSnS4 (CZTS) nanocrystals with photocatalytic properties
Source: Royal Society of Chemistry journal article supplement (doi:10.1039/c4ra03444a), 2014-01-01
Supplement: c4ra03444a1.pdf [file c4ra03444a1.pdf]

**Supplementary Information**

Surfactant-free Hydrothermal Synthesis of  $\text{Cu}_2\text{ZnSnS}_4$   
(CZTS) Nanocrystals and Photocatalytic Properties

*Jing Wang, Peng Zhang\*, Xuefeng Song, and Lian Gao\**

*State Key Laboratory for Metallic Matrix Composite Materials,*

*School of Materials Science and Engineering,*

*Shanghai Jiao Tong University, Shanghai, 200240, China.*

\*E-mail address: liangao@mail.sic.ac.cn (L. Gao); pengzhang2010@sjtu.edu.cn (P.  
Zhang)

Tel: +86-12-52412718. Fax: +86-21-52413122

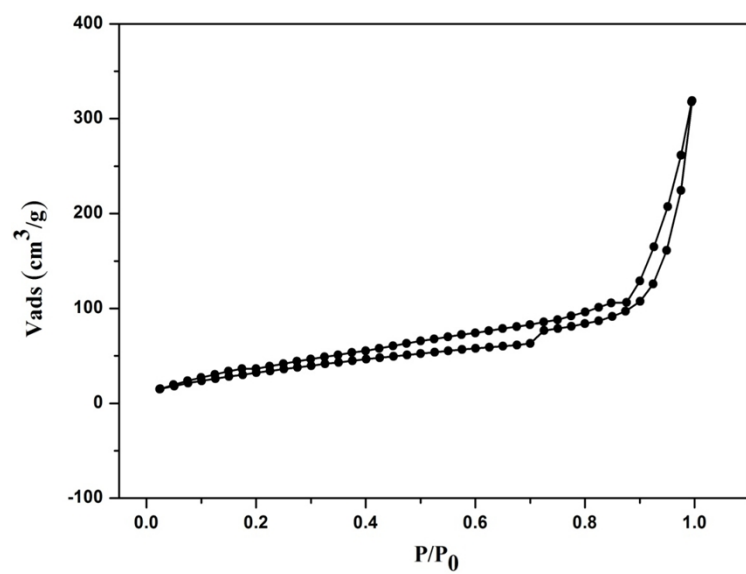

Fig. S1 Nitrogen adsorption-desorption isotherm of CZTS nanoparticles.

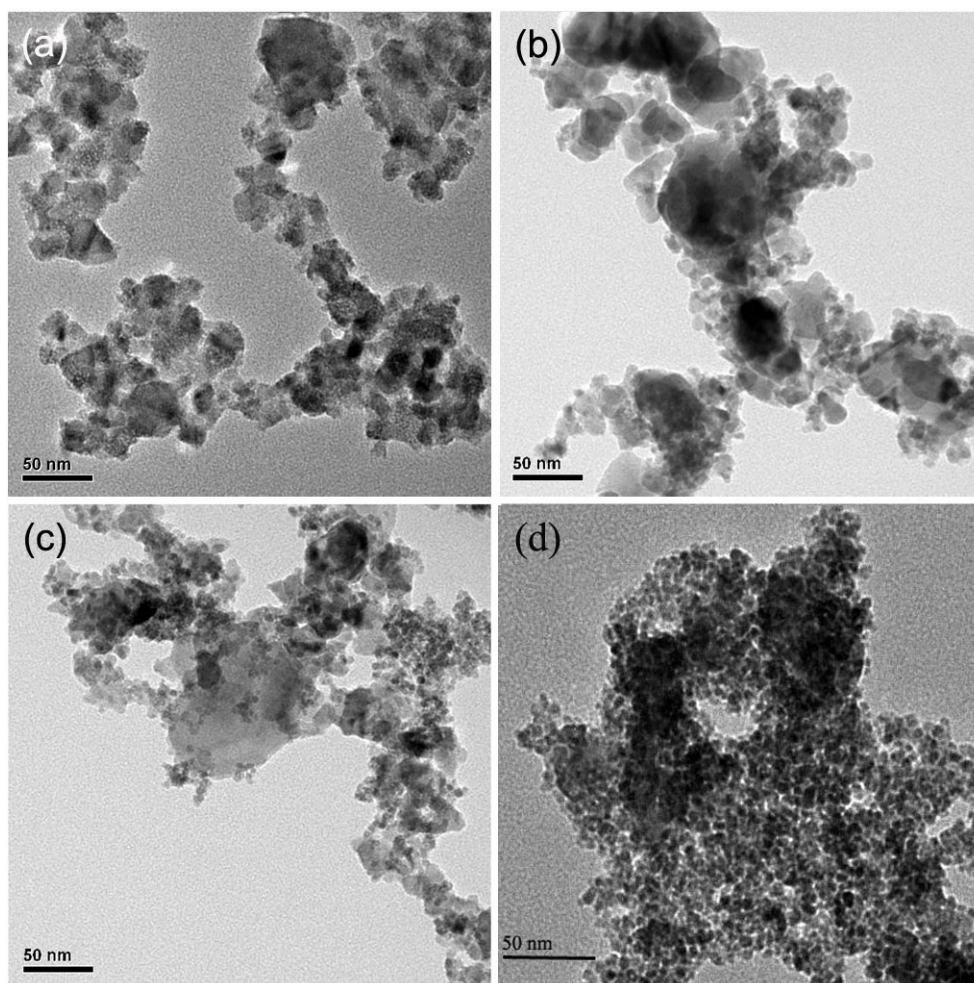

Fig. S2 TEM images of nanoparticles prepared (a) with the use of ammonia, (b) without the use of ammonia and NaOH, (c) with the use of NaOH, and (d) with the use of ammonia and half amount of TAA.

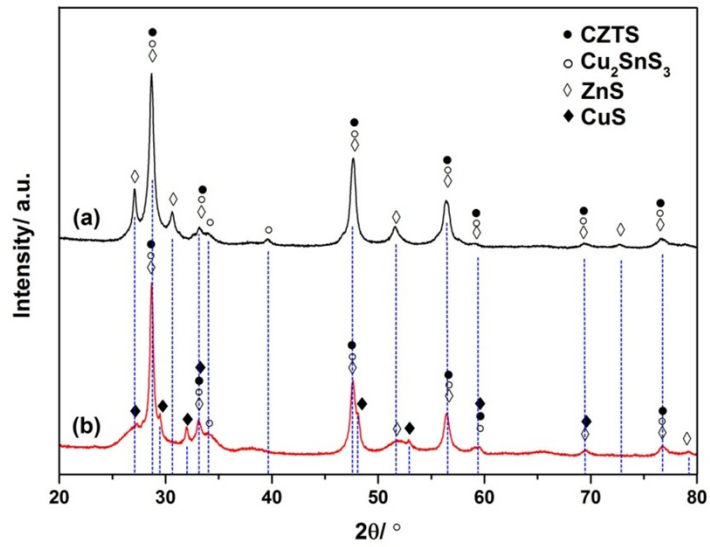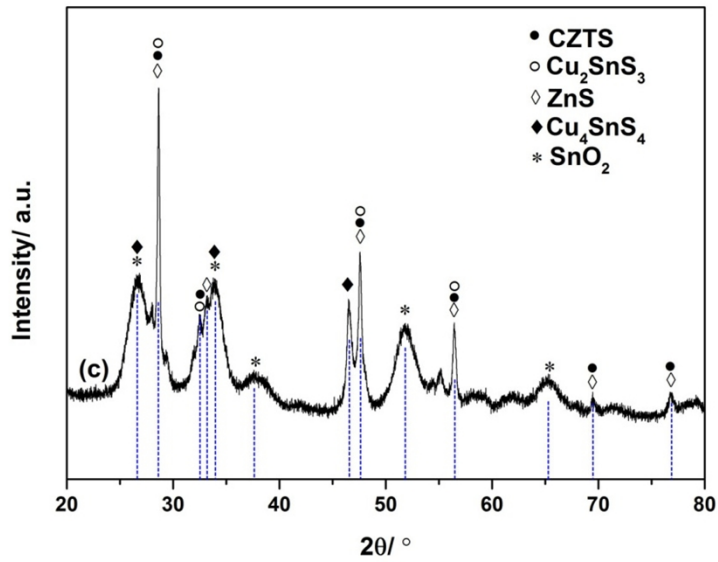

Fig. S3 XRD patterns of nanoparticles prepared (a) without the use of ammonia and NaOH, (b) with the use of NaOH, and (c) with the use of ammonia and half amount of TAA.

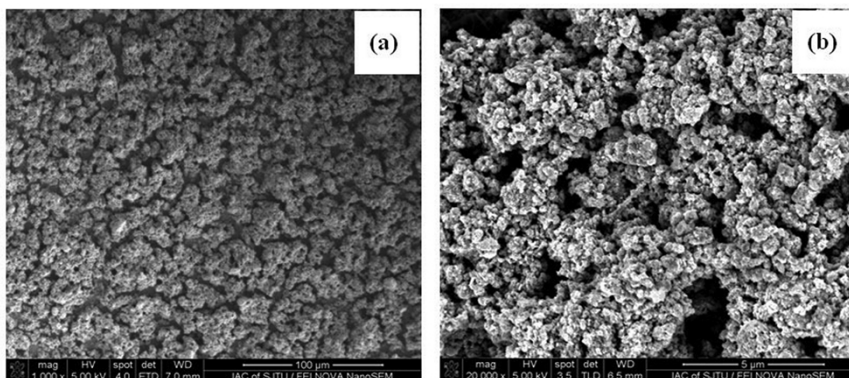

Fig. S4 SEM images of the thin film prepared by doctor blade method based on the paste of the nanoparticles: (a) low magnification; (b) high magnification.
